# Supplementary material for: Rock substrate rather than black stain alterations drives microbial community structure in the passage of Lascaux Cave
Source: PubMed Central journal article supplement (PMC6282324; doi:10.1186/s40168-018-0599-9), 2018-12-05
Supplement: 40168_2018_599_MOESM2_ESM.pdf [file 40168_2018_599_MOESM2_ESM.pdf]

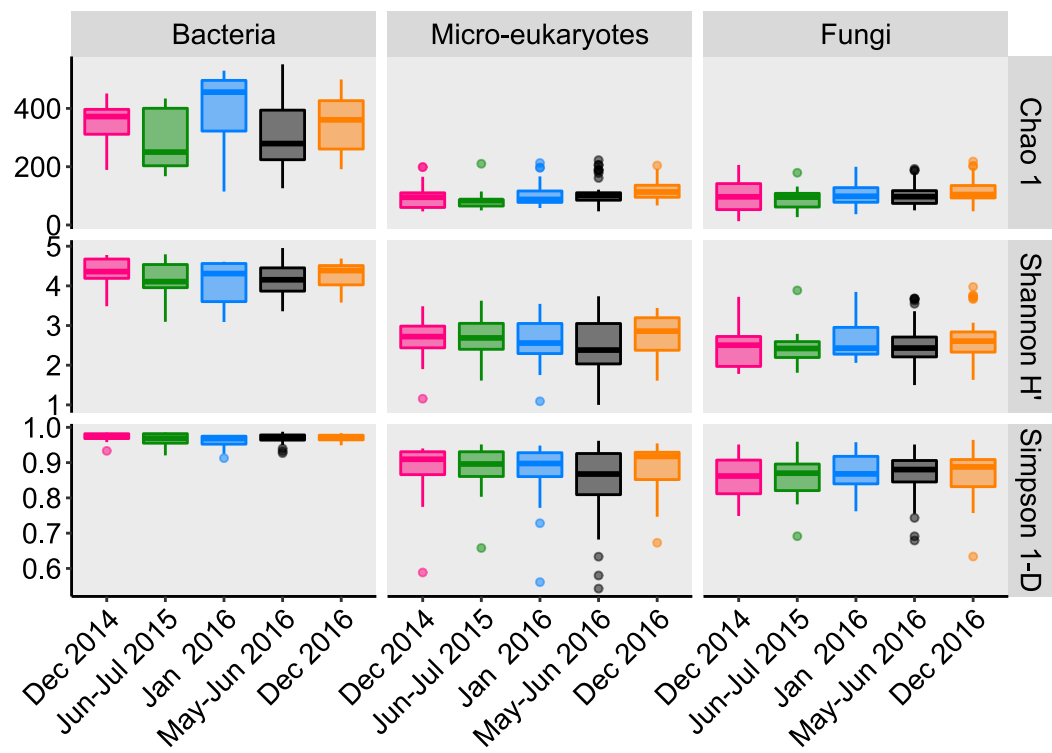

Figure S1
